# Supplementary material for: The physical and chemical characteristics of marine primary organic aerosol: a review
Source: Copernicus journal article supplement (doi:10.5194/acp-13-3979-2013), 2013-04-18
Supplement: Supplementary file 1 [file acp-13-3979-2013-supplement.pdf]

Supplementary material

Table S1. Observed clean marine organic aerosol concentrations ( $\mu\text{g m}^{-3}$ )\*

| Location                 | Lat   | Lon    | Collection date | Conc.           | Note        | Refs |
|--------------------------|-------|--------|-----------------|-----------------|-------------|------|
| Bermuda                  | 32.25 | -64.87 | 16-17 May 1973  | $0.42 \pm 0.1$  | (a)         | (1)  |
|                          |       |        | 17-18 May       | $0.36 \pm 0.08$ |             |      |
|                          |       |        | 18-19 May       | $0.32 \pm 0.1$  |             |      |
|                          |       |        | 21-22 May       | $0.36 \pm 0.08$ |             |      |
|                          |       |        | 23-24 May       | $0.66 \pm 0.15$ |             |      |
|                          |       |        | 24-26 May       | $0.21 \pm 0.04$ |             |      |
|                          |       |        | 28-29 May       | $0.38 \pm 0.08$ |             |      |
|                          |       |        | 30-31 May       | $0.50 \pm 0.18$ |             |      |
| Eastern Tropical Pacific | 5.49  | -83.72 | 11-12 Feb 1974  | $0.82 \pm 0.08$ | (a),(b),(c) | (2)  |
|                          |       |        | 12-13 Feb       | $0.24 \pm 0.08$ |             |      |
|                          |       |        | 13-14 Feb       | $0.57 \pm 0.08$ |             |      |
|                          |       |        | 14-15 Feb       | $0.59 \pm 0.08$ |             |      |
|                          |       |        | 15-16 Feb       | $0.57 \pm 0.08$ |             |      |
|                          |       |        | 16-17 Feb       | $0.16 \pm 0.08$ |             |      |
|                          |       |        | 17-18 Feb       | $0.08 \pm 0.08$ |             |      |
|                          |       |        | 18-19 Feb       | $0.50 \pm 0.08$ |             |      |
|                          |       |        | 19-20 Feb       | $0.16 \pm 0.08$ |             |      |
|                          |       |        | 20-21 Feb       | $0.24 \pm 0.08$ |             |      |
|                          |       |        | 21-22 Feb       | $0.41 \pm 0.08$ |             |      |
|                          |       |        | 22-23 Feb       | $0.51 \pm 0.08$ |             |      |

|                    |        |         |              |      |          |     |
|--------------------|--------|---------|--------------|------|----------|-----|
| Bermuda            | 32.25  | -64.87  | Jun 1975     | 0.52 | (a), (d) | (3) |
|                    |        |         | Jun          | 0.41 |          |     |
|                    |        |         | Jun          | 0.46 |          |     |
|                    |        |         | Jun          | 0.29 |          |     |
|                    |        |         | Jun          | 0.21 |          |     |
|                    |        |         | Jun          | 0.22 |          |     |
| Hawaii             | 21.37  | -147.70 | Jul-Oct 1975 | 0.60 | (a)      | (3) |
|                    |        |         | Jul-Oct      | 0.50 |          |     |
|                    |        |         | Jul-Oct      | 0.52 |          |     |
|                    |        |         | Jul-Oct      | 0.56 |          |     |
|                    |        |         | Jul-Oct      | 0.55 |          |     |
|                    |        |         | Jul-Oct      | 0.55 |          |     |
|                    |        |         | Jul-Oct      | 0.50 |          |     |
| American Samoa     | -14.30 | -170.57 | Jun-Aug 1976 | 0.57 | (e)      | (3) |
|                    |        |         | Jun-Aug      | 0.39 |          |     |
|                    |        |         | Jun-Aug      | 0.29 |          |     |
|                    |        |         | Jun-Aug      | 0.36 |          |     |
|                    |        |         | Jun-Aug      | 0.36 |          |     |
|                    |        |         | Jun-Aug      | 0.22 |          |     |
|                    |        |         | Jun-Aug      | 0.20 |          |     |
|                    |        |         | Jun-Aug      | 0.18 |          |     |
|                    |        |         | Jun-Aug      | 0.22 |          |     |
| Loop Head, Ireland | 52.6   | -9.9    | Jun-Jul 1977 | 0.80 | (f)      | (4) |
| Tasmania           | -40.68 | 144.68  | Feb 1978     | 0.74 | (f)      | (5) |

|                           |        |         |              |                 |                 |      |
|---------------------------|--------|---------|--------------|-----------------|-----------------|------|
| Tasmania                  | -40.68 | 144.68  | Sep 1979     | 0.45            |                 | (6)  |
|                           |        |         | Sep          | 0.32            |                 |      |
|                           |        |         | Sep          | 0.36            |                 |      |
|                           |        |         | Sep          | 0.20            |                 |      |
| Northeast Atlantic        | 40     | -10     | Oct 1980     | 0.42            | (c)             | (7)  |
| Western Tropical Atlantic | -20    | -40     | Nov 1980     | 0.43            | (c)             | (7)  |
| Tropical Pacific          | 0      | -110    | Jul 1982     | 0.35            | (b),(g),(h),(i) | (8)  |
|                           | 0      | -115    | Jul          | 0.24            |                 |      |
|                           | 0      | -122    | Jul          | 0.21            |                 |      |
|                           | -2     | -140    | Jul          | 0.11            |                 |      |
|                           | 0      | -140    | Jul          | 0.17            |                 |      |
|                           | 10     | -140    | Aug          | 0.39            |                 |      |
|                           | 18     | -140    | Aug          | 0.39            |                 |      |
| Bermuda                   | 32.25  | -64.87  | Aug 1982     | 1.08            | (j),(k),(h)     | (9)  |
|                           |        |         | Jan-Feb 1983 | 0.80            |                 |      |
| Eastern Tropical Pacific  | -15.0  | -80.0   | 14 Mar 1981  | $0.27 \pm 0.03$ | (l),(b)         | (10) |
|                           |        |         | 16 Mar       | $0.08 \pm 0.01$ |                 |      |
|                           |        |         | 20 Mar       | $0.21 \pm 0.02$ |                 |      |
|                           |        |         | 22 Mar       | $0.21 \pm 0.02$ |                 |      |
|                           |        |         | 25 Mar       | $0.38 \pm 0.03$ |                 |      |
|                           |        |         | 29 Mar       | $0.15 \pm 0.02$ |                 |      |
|                           |        |         | 1 Apr        | $0.08 \pm 0.01$ |                 |      |
|                           |        |         | 5 Apr        | $0.35 \pm 0.04$ |                 |      |
| American Samoa            | -14.30 | -170.57 | 7 Jul 1981   | $0.18 \pm 0.02$ | (l)             | (10) |

|                    |       |        |                |                  |         |      |
|--------------------|-------|--------|----------------|------------------|---------|------|
|                    |       |        | 17 Jul         | $0.15 \pm 0.02$  |         |      |
|                    |       |        | 28 Jul         | $0.15 \pm 0.02$  |         |      |
|                    |       |        | 5 Aug          | $0.10 \pm 0.01$  |         |      |
|                    |       |        | 26 Jan         | $0.13 \pm 0.01$  |         |      |
|                    |       |        | 17 Feb         | $0.20 \pm 0.02$  |         |      |
| Amsterdam Island   | -37.8 | 77.6   | 10 Feb 1982    | $0.21 \pm 0.02$  | (l)     | (10) |
| New Zealand coast  | -34.4 | 172.7  | 20 Jun 1983    | $0.21 \pm 0.02$  |         | (10) |
|                    |       |        | 10 Jul         | $0.17 \pm 0.02$  |         |      |
|                    |       |        | 28 Jul         | $0.17 \pm 0.02$  |         |      |
|                    |       |        | 19 Aug         | $0.18 \pm 0.02$  |         |      |
| Northeast Atlantic | 35.7  | -22.0  | 30 Apr 1985    | $0.80 \pm 0.08$  | (l),(b) | (10) |
|                    |       |        | 6 May          | $0.42 \pm 0.04$  |         |      |
|                    |       |        | 9 May          | $0.31 \pm 0.03$  |         |      |
|                    |       |        | 13 May         | $0.43 \pm 0.04$  |         |      |
| Puerto Rico        | 18.32 | -65.75 | 2-3 Apr 1992   | $0.556 \pm 0.14$ | (m)     | (11) |
|                    |       |        | 4-5 Apr        | $0.896 \pm 0.15$ |         |      |
|                    |       |        | 8-9 Apr        | $0.568 \pm 0.13$ |         |      |
|                    |       |        | 10-11 Apr      | $0.628 \pm 0.14$ |         |      |
| Puerto Rico        | 18.32 | -65.75 | 12-13 Feb 1995 | 0.496            | (n),(o) | (12) |
|                    |       |        | 13-14 Feb      | 0.830            |         |      |
|                    |       |        | 14-15 Feb      | 0.588            |         |      |
|                    |       |        | 15-16 Feb      | 0.501            |         |      |
|                    |       |        | 16-17 Feb      | 0.267            |         |      |

|                           |        |         |                  |                 |             |      |
|---------------------------|--------|---------|------------------|-----------------|-------------|------|
|                           |        |         | 13-14 Mar        | 0.487           |             |      |
|                           |        |         | 14-15 Mar        | 0.329           |             |      |
|                           |        |         | 15-16 Mar        | 0.592           |             |      |
|                           |        |         | 16-17 Mar        | 0.491           |             |      |
|                           |        |         | 30 May           | 0.626           |             |      |
|                           |        |         | 31 May           | 0.678           |             |      |
|                           |        |         | 1 Jun            | 0.578           |             |      |
|                           |        |         | 2 Jun            | 0.676           |             |      |
| Tenerife                  | 28.3   | -16.5   | Jun-Jul 1997     | 0.29            | (o),(p)     | (13) |
| Bermuda                   | 32.25  | -64.87  | Apr-Jun 1998     | 0.53            | (q),(r),(s) | (14) |
| Trinidad Head, California | 41.05  | -124.15 | Apr-May 2002     | 0.38            | (t)         | (15) |
| Northeast Pacific         | 30     | -160    | Mar 2001         | 0.28 $\pm$ 0.05 | (u),(v),(w) | (16) |
| Mace Head, Ireland        | 53.3   | -9.9    | Apr-Oct 2002     | 0.91            | (h),(p),(x) | (17) |
| North Pacific             | 50.0   | -145.0  | Jul 2002         | 0.3 $\pm$ 0.1   | (p),(y)     | (18) |
| Mace Head, Ireland        | 53.3   | -9.9    | Winter 2002-2004 | 0.07            | (h),(p),(x) | (19) |
|                           |        |         | Spring           | 0.72            |             |      |
|                           |        |         | Summer           | 0.68            |             |      |
|                           |        |         | Fall             | 0.50            |             |      |
| Southwest Atlantic        | -44    | -20     | Jan 2007         | 0.03            | (b),(z)     | (20) |
|                           | -44    | -60     | 31 Jan-2 Feb     | 0.32            |             |      |
|                           | -60    | -40     | Mar              | 0.02            |             |      |
| Amsterdam Island          | -37.80 | 77.57   | Jan 2003-2007    | 0.381           | (aa),(ab)   | (21) |
|                           |        |         | Feb              | 0.253           |             |      |
|                           |        |         | Mar              | 0.203           |             |      |

|                           |       |        |                |       |             |      |
|---------------------------|-------|--------|----------------|-------|-------------|------|
|                           |       |        | Apr            | 0.172 |             |      |
|                           |       |        | May            | 0.171 |             |      |
|                           |       |        | Jun            | 0.136 |             |      |
|                           |       |        | Jul            | 0.144 |             |      |
|                           |       |        | Aug            | 0.150 |             |      |
|                           |       |        | Sep            | 0.164 |             |      |
|                           |       |        | Oct            | 0.130 |             |      |
|                           |       |        | Nov            | 0.151 |             |      |
|                           |       |        | Dec            | 0.272 |             |      |
| <hr/>                     |       |        |                |       |             |      |
| Eastern Tropical Atlantic | 29    | -15    | May 2007       | 0.2   | (h),(p),(y) | (22) |
|                           | 23    | -21    | May            | 0.8   |             |      |
|                           | 21    | -22    | May            | 0.6   |             |      |
|                           | 19    | -25    | May            | 0.4   |             |      |
| <hr/>                     |       |        |                |       |             |      |
| Northeast Atlantic        | 46.49 | -44.67 | Mar 2008       | 0.73  | (h),(p)     | (23) |
|                           | 63.25 | 18.42  | Apr            | 0.35  |             |      |
|                           | 70.95 | -7.80  | Apr            | 0.27  |             |      |
|                           | 70.24 | -13.40 | Apr            | 0.28  |             |      |
| <hr/>                     |       |        |                |       |             |      |
| Mace Head, Ireland        | 53.3  | -9.9   | 11-18 Jan 2006 | 0.04  | (h),(p)     | (24) |
|                           |       |        | 18-22 Jan      | 0.13  |             |      |
|                           |       |        | 10-20 Feb      | 0.17  |             |      |
|                           |       |        | 29 Mar-4 Apr   | 0.08  |             |      |
|                           |       |        | 12-26 Apr      | 0.18  |             |      |
|                           |       |        | 12-19 Jun      | 0.31  |             |      |
|                           |       |        | 19-28 Jun      | 0.24  |             |      |

|                          |      |      |              |      |                  |      |
|--------------------------|------|------|--------------|------|------------------|------|
|                          |      |      | 28 Jun-5 Jul | 0.38 |                  |      |
|                          |      |      | 3-8 Sep      | 0.10 |                  |      |
|                          |      |      | 5-11 Oct     | 0.10 |                  |      |
|                          |      |      | 15-22 Nov    | 0.07 |                  |      |
|                          |      |      | 4-11 Dec     | 0.07 |                  |      |
| Northwest Pacific        | 41   | 155  | Jul-Aug 2008 | 0.88 | (b),(ac),(ad)    | (25) |
|                          | 45   | 167  | Aug          | 0.55 | (b),(ac),(ae)    |      |
| Northwest Pacific        | 30   | 150  | Sep 2008     | 1.06 | (b),(ac)         | (26) |
|                          | 43   | 155  | Aug          | 1.69 | (b),(ac)         |      |
| North Pacific            | 31   | 175  | Nov 1989     | 0.22 | (b),(ac),(af)    | (27) |
|                          | 30   | -160 | Nov          | 0.08 |                  |      |
|                          | 32   | -135 | Nov          | 0.11 |                  |      |
| North Atlantic           | 30   | -60  | Dec 1989     | 0.32 | (b),(ac),(af)    | (27) |
|                          | 30   | -35  | Dec          | 0.25 |                  |      |
| Mace Head, Ireland       | 53.3 | -9.9 | 14 Aug 2009  | 0.16 | (h),(z),(p),(ag) | (28) |
|                          |      |      | 15 Aug       | 0.57 |                  |      |
|                          |      |      | 16 Aug       | 2.49 |                  |      |
|                          |      |      | 17 Aug       | 0.74 |                  |      |
|                          |      |      | 18 Aug       | 0.35 |                  |      |
|                          |      |      | 19 Aug       | 0.31 |                  |      |
| Northeast Pacific        | 45   | -130 | Apr 2006     | 0.15 | (p),(z)          | (29) |
| Eastern Tropical Pacific | -20  | -85  | Oct-Nov 2008 | 0.10 | (p),(z)          | (29) |
| Eastern Tropical Pacific | 10   | -140 | Sep 2009     | 0.02 | (p),(z)          | (29) |

\* When applicable, concentrations are converted from  $\mu\text{g C m}^{-3}$  to  $\mu\text{g m}^{-3}$  using an organic matter/organic carbon ratio of 1.4. When reported, uncertainty ranges are depicted by  $\pm$  values.

(1) Hoffman and Duce (1974); (2) Barger and Garrett (1976); (3) Hoffman and Duce (1977); (4) Eichmann et al. (1979); (5) Eichmann et al. (1980); (6) Andreae (1982); (7) Andreae (1983); (8) Andreae et al. (1984); (9) Wolff et al. (1986); (10) Cachier et al. (1986); (11) Novakov and Penner (1993); (12) Novakov et al. (1997); (13) Putaud et al. (2000); (14) Turekian et al. (2003); (15) Allan et al. (2004); (16) Quinn et al. (2004); (17) Cavalli et al. (2004); (18) Phinney et al. (2006); (19) Yoon et al. (2007); (20) Zorn et al. (2008); (21) Sciare et al. (2009); (22) Lee et al. (2010); (23) Russell et al. (2010); (24) Rinaldi et al. (2010); (25) Miyazaki et al. (2010); (26) Miyazaki et al. (2011); (27) Fu et al. (2011); (28) Ovadnevaite et al. (2011a); (29) Shank et al. (2012)

(a) Atmospheric samples were collected over a period of 24 to 48 hours on precombusted glass-fiber filters and extracted with chloroform

(b) Ship-borne measurements with the average coordinates reported between the start and end of a sampling period

(c) We have included samples having BC concentrations  $< 0.05 \mu\text{g m}^{-3}$  and a BC/total carbon ratio  $< 0.1$ .

(d) We have omitted samples with high dust loading

(e) Atmospheric samples were collected over a period of 7 days on precombusted glass fiber filters and extracted with chloroform

(f) Atmospheric samples with no continental contact during 48 hr back trajectory were collected over a period of 12 to 48 hours on precombusted glass fiber filters and analyzed using a combustion method

(g) In the aerosol fraction  $\leq 1.7 \mu\text{m}$  diameter

(h) Samples having BC concentrations  $< 0.05 \mu\text{g m}^{-3}$

(i) Excess potassium  $< 5 \text{ ng m}^{-3}$

(j) Atmospheric samples were collected over a period of 24 hours on Microquartz filters and analyzed using a combustion method

(k) In the aerosol fraction  $\leq 2.5 \mu\text{m}$  diameter

(l) Atmospheric samples were collected over a period of 2 days to 2 weeks on precombusted glass-fiber filters and extracted with different kinds of solvent

(m) Atmospheric samples were collected over a period of 24 hours on aluminum foil substrates and analyzed using thermal-optical reflectance method

(n) Atmospheric samples were collected over a period of 12 to 24 hours on precombusted quartz-fiber filters and analyzed by thermal Evolved Gas Analysis

(o) In the aerosol fraction  $\leq 0.6 \mu\text{m}$  diameter

(p) In the aerosol fraction  $\leq 1 \mu\text{m}$  diameter

(q) Atmospheric samples were collected over a period of 20 to 48 hours on precombusted glass-fiber filters and analyzed with Carlo-Erba NA 1500 NCS elemental analyzer

(r) Geometric mean diameter  $< 1.2 \mu\text{m}$

(s) Numbers in parentheses represent upper and lower estimates

(t) Atmospheric samples were collected over a period of 20 to 48 hours on precombusted glass-fiber filters and analyzed with Carlo-Erba NA 1500 NCS elemental analyzer



- (u) Atmospheric samples were collected over a period of 2.5 to 12 hours on quartz filter and analyzed with a Sunset Labs thermal/optical analyzer
- (v) In the aerosol fraction  $\leq 1.1 \mu\text{m}$  diameter
- (w) The mass of particulate organic matter (POM) was determined by multiplying the measured OC concentration in  $\mu\text{g m}^{-3}$  by a factor of 2.1 in the marine region
- (x) Atmospheric samples were collected over a period of 7 days on tedlar foil (for water soluble organic carbon) and quartz filters (for total carbon) and analyzed with a Total Organic Carbon liquid analyzer and thermal Evolved Gas Analysis, respectively
- (y) The real-time quantitative measurements of atmospheric samples were conducted using Aerodyne Aerosol Mass Spectrometer (AMS)
- (z) The real-time quantitative measurements of atmospheric samples were conducted using Aerodyne High-Resolution-Time-of-Flight AMS (HR-ToF-AMS)
- (aa) Atmospheric samples were collected over a period of 8 to 10 days on prefired Whatman QMA quartz filters and analyzed with a thermo-optical transmission carbon analyzer system and total organic carbon analyzer
- (ab) Non-methanesulfonate organic carbon (nms-OC)
- (ac) Atmospheric samples were collected on precombusted quartz filters and analyzed using a Sunset lab EC/OC analyzer
- (ad) Highly biologically influenced aerosols
- (ae) Less biologically influenced aerosols
- (af) Samples having EC concentrations below detection limit (not defined) are used
- (ag) Daily average
